# Supplementary material for: Frequency distribution of hepatitis C virus genotypes in different geographical regions of Pakistan and their possible routes of transmission
Source: Springer Nature journal article supplement (doi:10.1186/1471-2334-8-69), 2008-05-23
Supplement: 12879_2007_660_MOESM1_ESM.pdf [file 12879_2007_660_MOESM1_ESM.pdf]

Total 5723 anti-HCV positive sera samples of patients with chronic HCV were tested by HCV Qualitative PCR

1988 sera were excluded from the study because they were negative by HCV RNA PCR and failed to meet inclusion criteria

3735 sera were further tested by Real-time PCR for HCV RNA quantification

384 sera were excluded from the study due to low viral load (<500 IU/ml) that may not be enough to be genotyped

3351 sera were further tested by genotyping method for the determination of frequency distribution

Total 2165 genotyped patients belonged to Punjab

Total 823 genotyped patients belonged to N.W.F.P

Total 239 genotyped patients belonged to Sindh region

Total 124 genotyped patients belonged to Balochistan
